# Supplementary material
Source: publisher site journal article supplement (https://www.spandidos-publications.com/4477/downloadSupplementary)

Figure S1. *BIRC5* is overexpressed in tumor tissues of patients with different cancer types and upregulation of *BIRC5* correlates with poor prognostic outcomes in patients. (A) The expression of *BIRC5* mRNA in pan cancers was analyzed by using the online available software TNMplot (<https://tnmplot.com/analysis/>). Significant differences by Mann-Whitney U test are marked with a \* $P < 0.0001$ . AML, acute myeloid leukemia; Lung\_AC, lung adenocarcinoma; Lung\_SC, lung squamous cell carcinoma; Renal\_CC, renal clear cell carcinoma; Renal\_CH, renal chromophobe cell carcinoma; Renal\_PA, renal papillary cell carcinoma; Uterus\_SC, uterine carcinosarcoma, Uterus\_EC, uterine corpus endometrial carcinoma. (B) Kaplan-Meier survival estimates of high (red line) or low (black line) *BIRC5* expression in lung, gastric, and the endocrine therapy-treated estrogen receptor-positive breast cancer. Analysis was performed using the online database and web tool Kaplan Meier plotter (<https://kmplot.com/analysis/>).

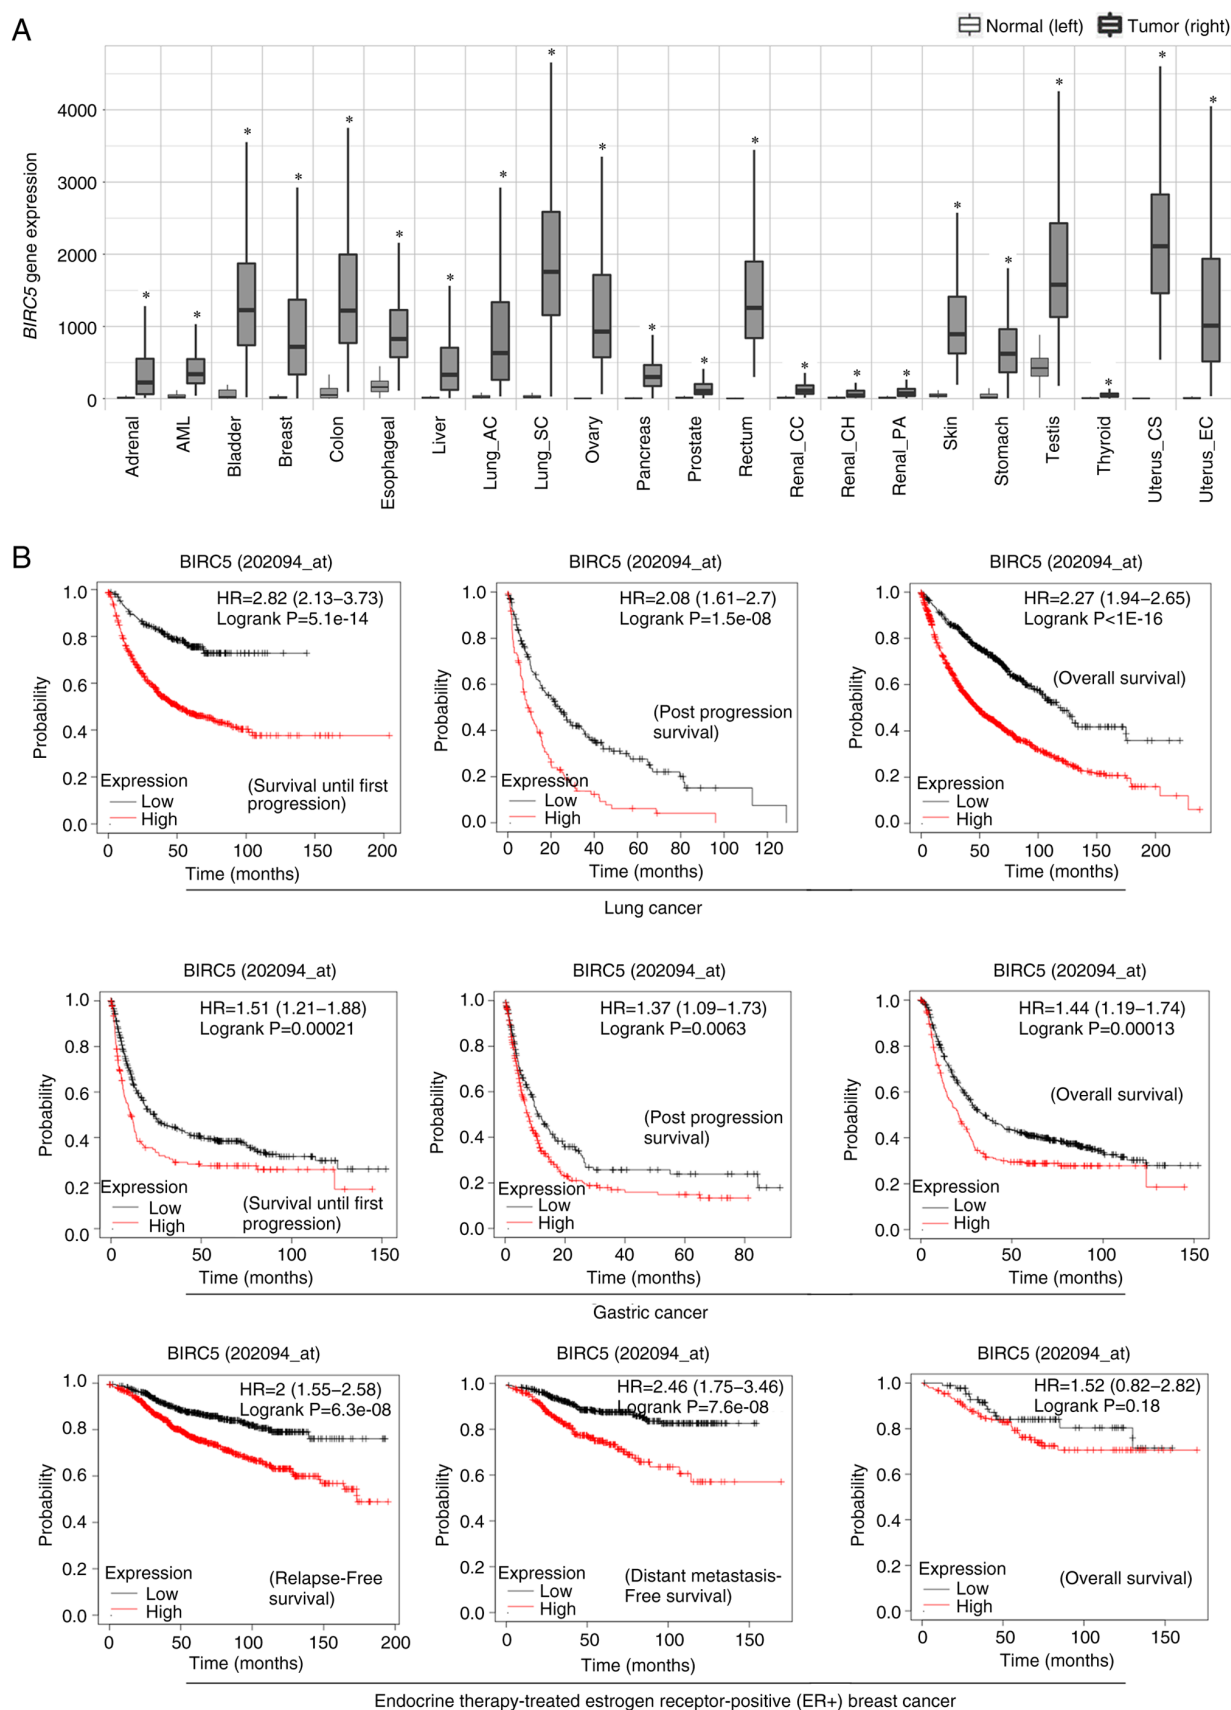

Figure S2. Expression of ABCB1 and BIRC5 and effects of pSur-125a in cells. (A) Expression of ABCB1 in cells was determined by western blotting. ACTA1 was used as an internal control. (B) Cells were liposomal transfected with pSur-125a for 48 h and the amount of miR-125a-5p present in cells was determined by qPCR analysis. (C) Relative amount of *BIRC5* mRNA transcripts present in cells was determined by qPCR analysis. (D) BIRC5 in cells was determined by western blotting. ACTA1 was used as an internal control. (E) HMEC-1 cells were liposomal transfected with pCMV6-AC-GFP for 48 h and the expression of GFP was observed using fluorescence microscopy. \* $P < 0.05$  and \*\* $P < 0.01$ . Nucleus were stained blue with DAPI. qPCR, quantitative PCR.

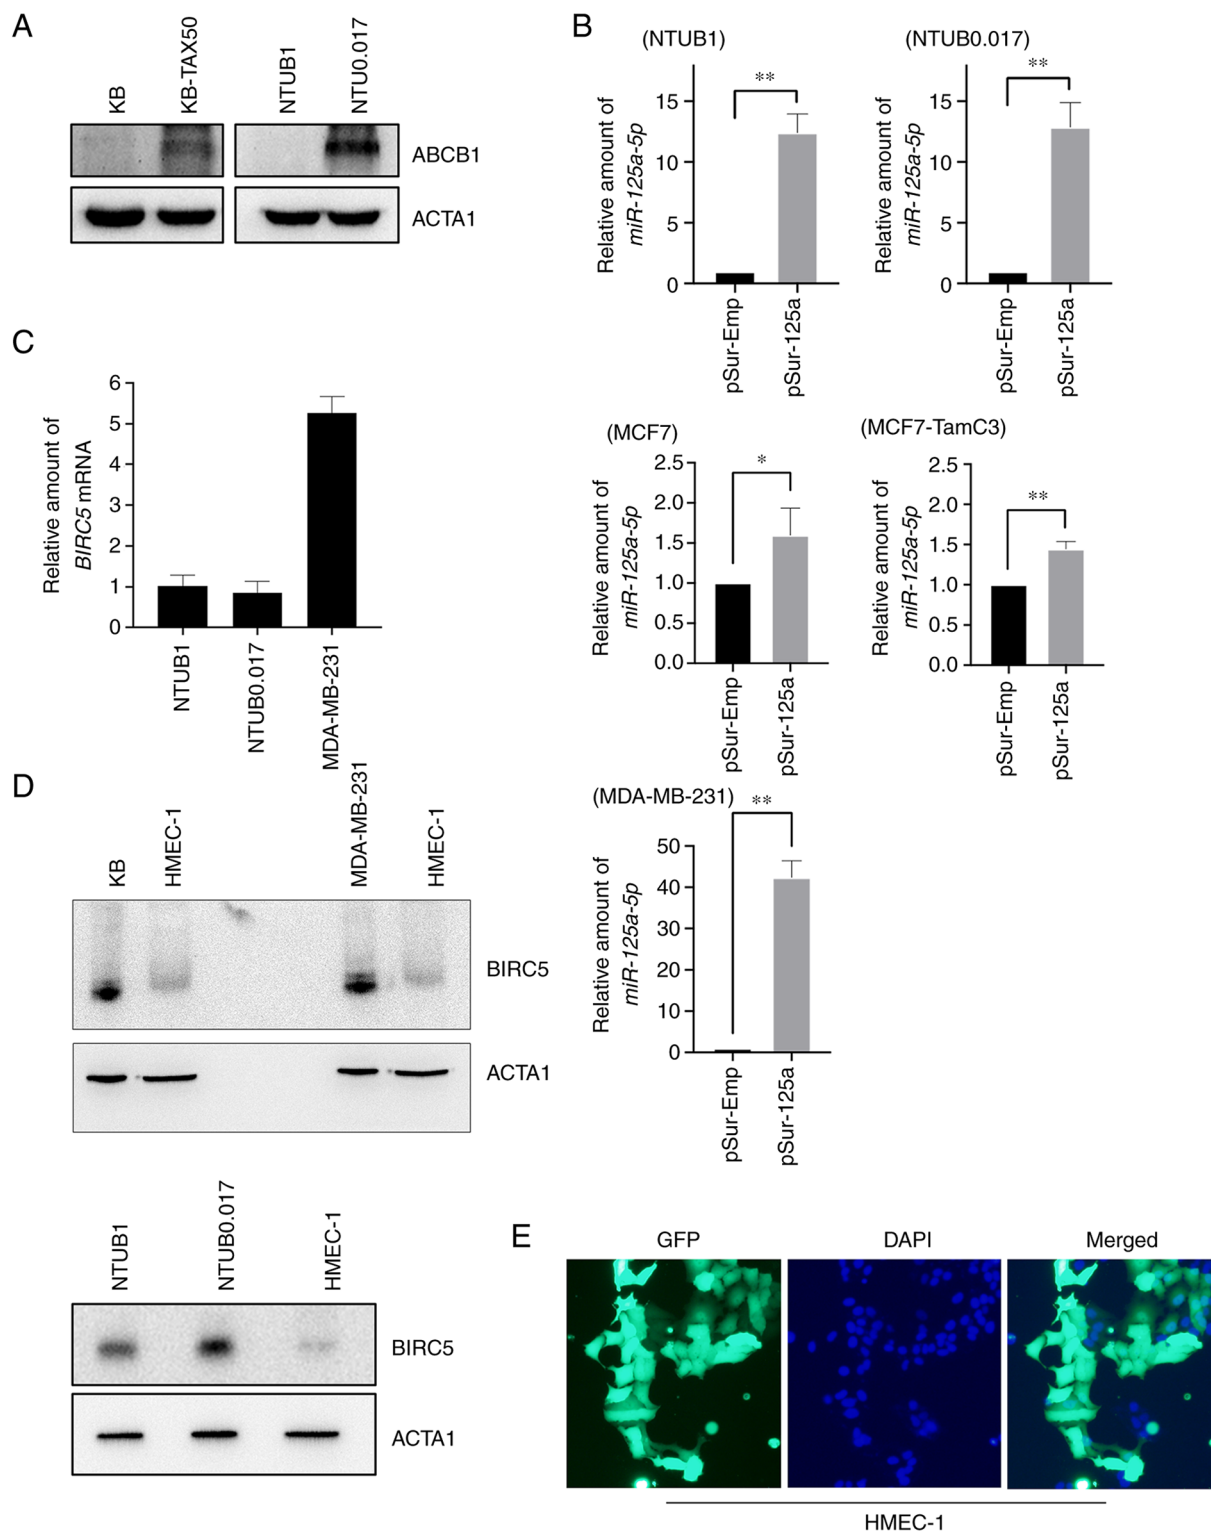

Figure S3. Molecular and cellular effects of pL-MNP-pSur-125a in cancer cells. (A) KB-TAX50 cells were treated with pL-MNP-pSur-Emp or pL-MNP-pSur-125a for 48 h. Expression of HDAC5 was determined by western blotting. (B) KB cells were treated with pL-MNP-pSur-Emp, pL-MNP-pSur-125a, or liposomal transfected with or without miR-125a-5p for 48 h. Expression of TDO2 in cells was determined by western blotting. (C) Cancer cells were treated with either pL-MNP-pSur-Emp or pL-MNP-pSur-125a for 96 h and the cell viability was determined using the MTT assay. A statistically significant difference in the cell viability between the testing groups is denoted by \* $P < 0.05$  and \*\*\*\* $P < 0.0001$ . miR, microRNA; HDAC, histone deacetylase 5.

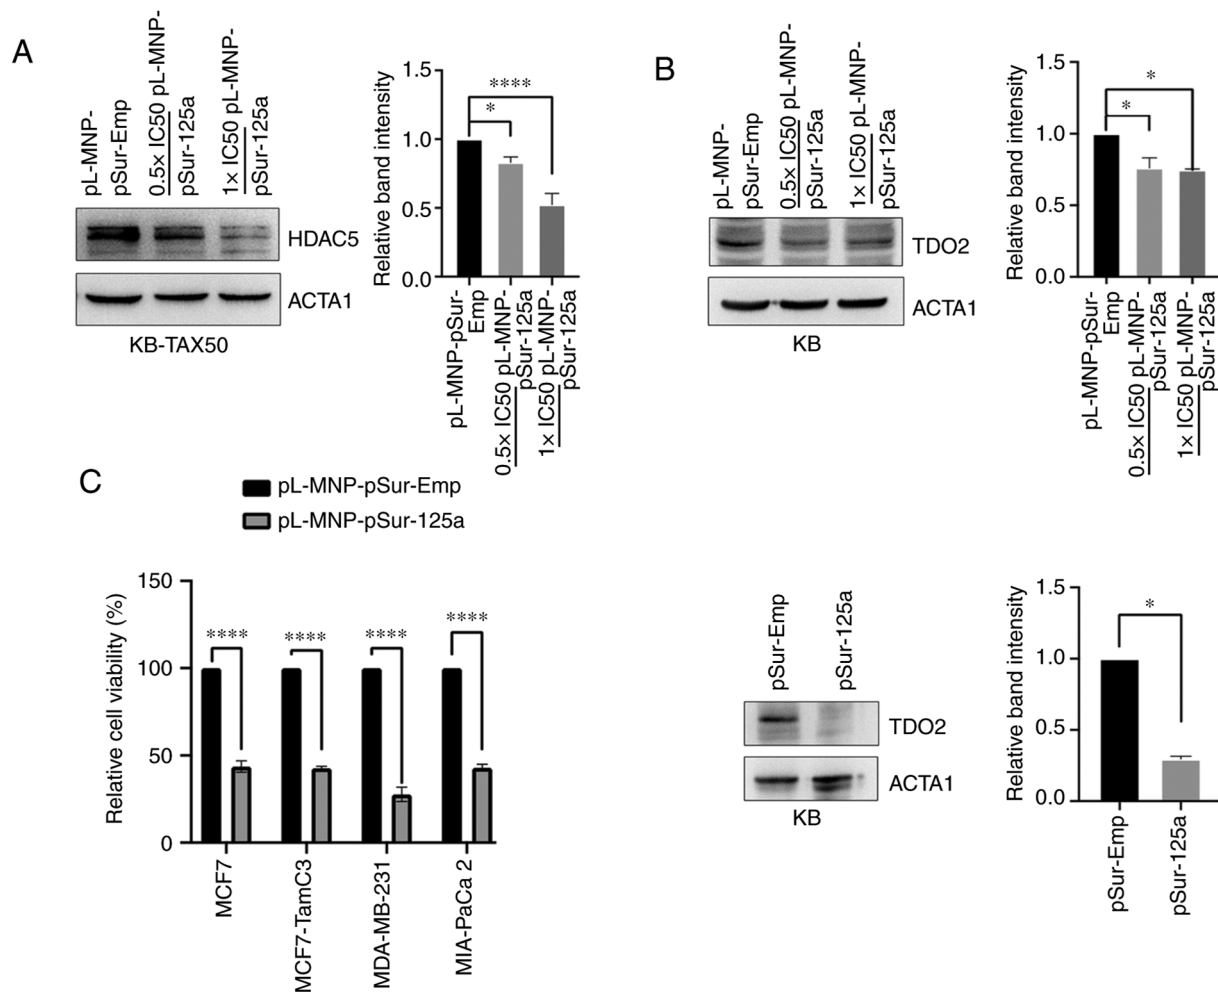

Supplement: Supplementary file 1 [file downloadSupplementary]
